# Supplementary material for: Highly sensitive determination of dissolved ultra-trace phosphorus by ICP-MS with methane mixed plasma
Source: Royal Society of Chemistry journal article supplement (doi:10.1039/d0ja00462f), 2020-12-18
Supplement: d0ja00462f1.pdf [file d0ja00462f1.pdf]

## Electronic Supplementary Information

### Highly sensitive determination of dissolved ultra-trace phosphorus by ICP–MS with methane mixed plasma

Ying Zhang, Jianguo Qu \*, Yan Chang, Yue Li

*State Key Laboratory of Estuarine and Coastal Research, East China Normal University, 500 Dongchuan Road,  
Shanghai 200241, China*

Table S1 Major spectral interferences for  $^{31}\text{P}$

| Isotope         | Mass<br>$m_1/\text{amu}$ | Interferences                            | Mass<br>$m_2/\text{amu}$ | $\Delta m/\text{amu}$ | $R_T$ ( $R_T = m/\Delta m$ ) |
|-----------------|--------------------------|------------------------------------------|--------------------------|-----------------------|------------------------------|
| $^{31}\text{P}$ | 30.9738                  | $^1\text{H}_2^{29}\text{Si}$             | 30.9922                  | 0.0184                | 1683                         |
|                 |                          | $^{15}\text{N}^{16}\text{O}$             | 30.9950                  | 0.0212                | 1461                         |
|                 |                          | $^{19}\text{F}^{12}\text{C}$             | 30.9984                  | 0.0246                | 1259                         |
|                 |                          | $^1\text{H}^2\text{H}^{28}\text{Si}$     | 30.9989                  | 0.0251                | 1234                         |
|                 |                          | $^1\text{H}_3^{28}\text{Si}$             | 31.0004                  | 0.0266                | 1164                         |
|                 |                          | $^{14}\text{N}^{17}\text{O}$             | 31.0022                  | 0.0284                | 1091                         |
|                 |                          | $^{13}\text{C}^{18}\text{O}$             | 31.0025                  | 0.0287                | 1079                         |
|                 |                          | $^{14}\text{N}^{16}\text{O}^1\text{H}$   | 31.0058                  | 0.0320                | 968                          |
|                 |                          | $^{12}\text{C}^{18}\text{O}^1\text{H}$   | 31.0070                  | 0.0332                | 933                          |
|                 |                          | $^{12}\text{C}^{16}\text{O}^1\text{H}_3$ | 31.0184                  | 0.0446                | 694                          |
|                 |                          | $^{62}\text{Ni}^{++}$                    | 30.9642                  | 0.0096                | 3226                         |

Table S2 Comparison of the CH<sub>4</sub>-ICP-MS and PMB determination results for P in standard reference materials

| Standard reference materials  | Certified value<br>(mean ± U, mg L <sup>-1</sup> ) | Determine methods       | Found (n = 9)<br>(mean ± 2σ, mg L <sup>-1</sup> ) | RE (%) | RSD (%) |
|-------------------------------|----------------------------------------------------|-------------------------|---------------------------------------------------|--------|---------|
| GSB 07-3169-2014 <sup>a</sup> | 0.804 ± 0.029                                      | CH <sub>4</sub> -ICP-MS | 0.805 ± 0.021                                     | 0.1    | 1.3     |
|                               |                                                    | PMB                     | 0.819 ± 0.065                                     | 1.9    | 4.0     |
| GBW(E)081020 <sup>a</sup>     | 0.318 ± 0.016                                      | CH <sub>4</sub> -ICP-MS | 0.314 ± 0.004                                     | -1.3   | 0.6     |
|                               |                                                    | PMB                     | 0.310 ± 0.029                                     | -2.5   | 4.6     |
| GBW(E)081215 <sup>b</sup>     | 100 ± 2.8                                          | CH <sub>4</sub> -ICP-MS | 102.5 ± 2.2                                       | 2.5    | 1.1     |
|                               |                                                    | PMB                     | 104.6 ± 4.8                                       | 4.6    | 2.3     |

<sup>a</sup> Contains DOP

<sup>b</sup> Contains only PO<sub>4</sub><sup>3-</sup>
